# Supplementary material for: Mutation order in acute myeloid leukemia identifies uncommon patterns of evolution and illuminates phenotypic heterogeneity
Source: Research Square preprint supplement (doi:10.21203/rs.3.rs-3516536/v1), 2023-11-06
Supplement: Supplementary file 1 [file eebd0d5f9dfea9aa1e1c0986.xlsx]

## Sheet: Sheet1
Variable	MD Anderson (n = 114)	MSK (n = 96)	Stanford (n = 15)
Age	61.5 (21-91)	66.5 (20-86)	53 (22-70)
Female sex	0.39	0.42	0.53
Secondary AML	0.26	0.23	0.07
Stem cell transplant recipient	0.35	0.35	0.53
Diagnosis sample available	0.71	0.36	1
Complex cytogenetics	0.11	0.19	0.07
Abnormal cytogenetics	0.42	0.6	0.21
Treatment at first induction*
Intensive chemotherapy	0.61	0.46	1
HMA-based therapy	0.38	0.36	0
Other	0.01	0.18	0
Complete blood count*
WBC count	11.1 (1.1-363)	7.3 (0.5-88.4)	67.5 (1.3-210)
Peripheral blast %	20 (7-94)	20 (0-88)	75 (7-97)
Peripheral monocyte %	8 (0-69)	5 (0-62)	0 (0-9)
